# Supplementary material
Source: MDPI journal article supplement (https://www.mdpi.com/2073-4352/12/12/1748)
Supplement: s1 [file s1]

# New Metformin–Citric Acid Pharmaceutical Molecular Salt: Improving Metformin Physicochemical Properties

Cristóbal Verdugo-Escamilla <sup>1,\*</sup>, Carolina Alarcón-Payer <sup>2</sup>,  
Francisco Javier Acebedo-Martínez <sup>1</sup>, Alicia Domínguez-Martín <sup>3</sup>  
and Duane Choquesillo-Lazarte <sup>1</sup>

## Supporting Information

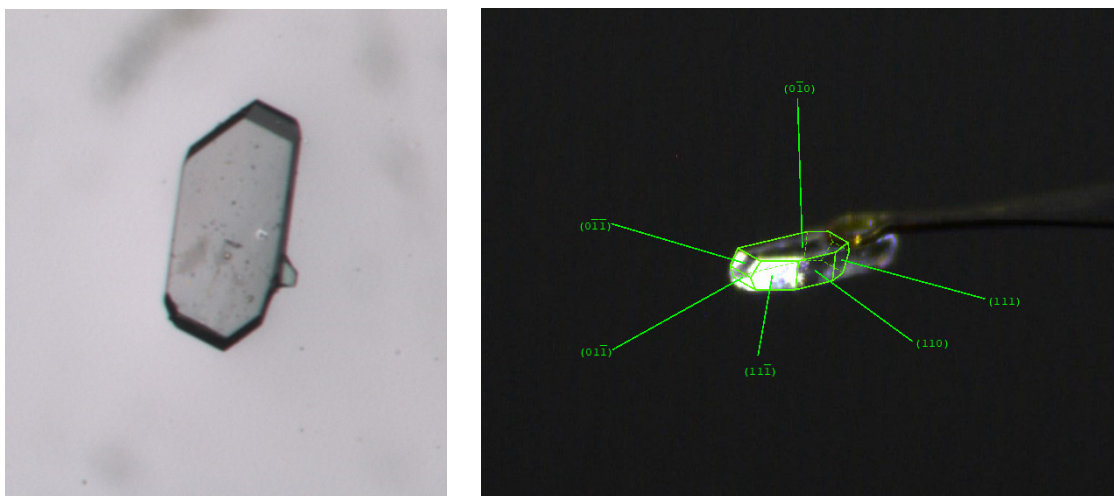

**Figure S1.** Average crystal morphology of MTF–CIT crystallizing from methanol solution (left) and face indexing of a MTF–CIT crystal (right).

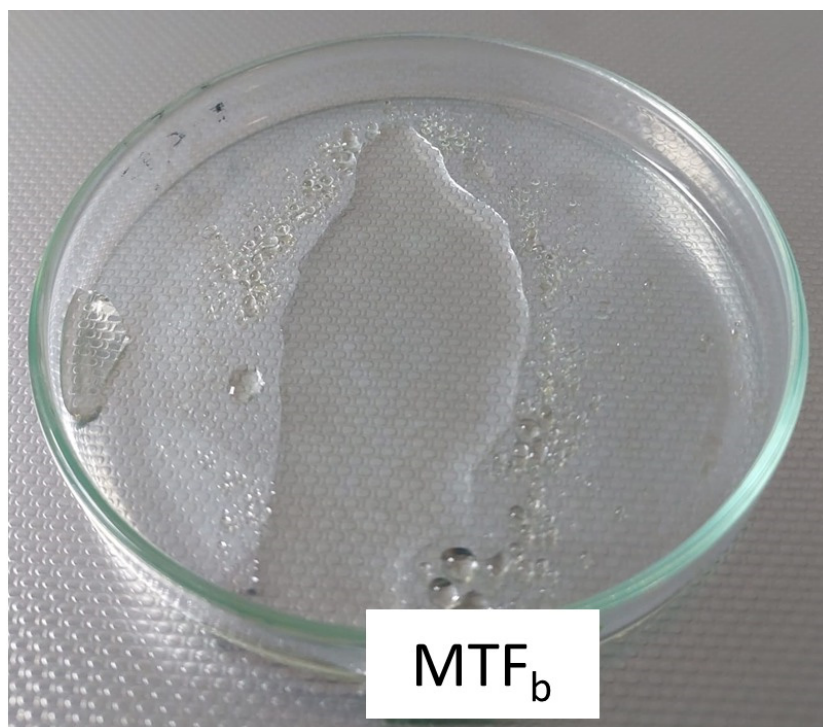

**Figure S2.** MTF base solid sample after less than 1 hour exposition to 40 °C and 75% relative humidity.

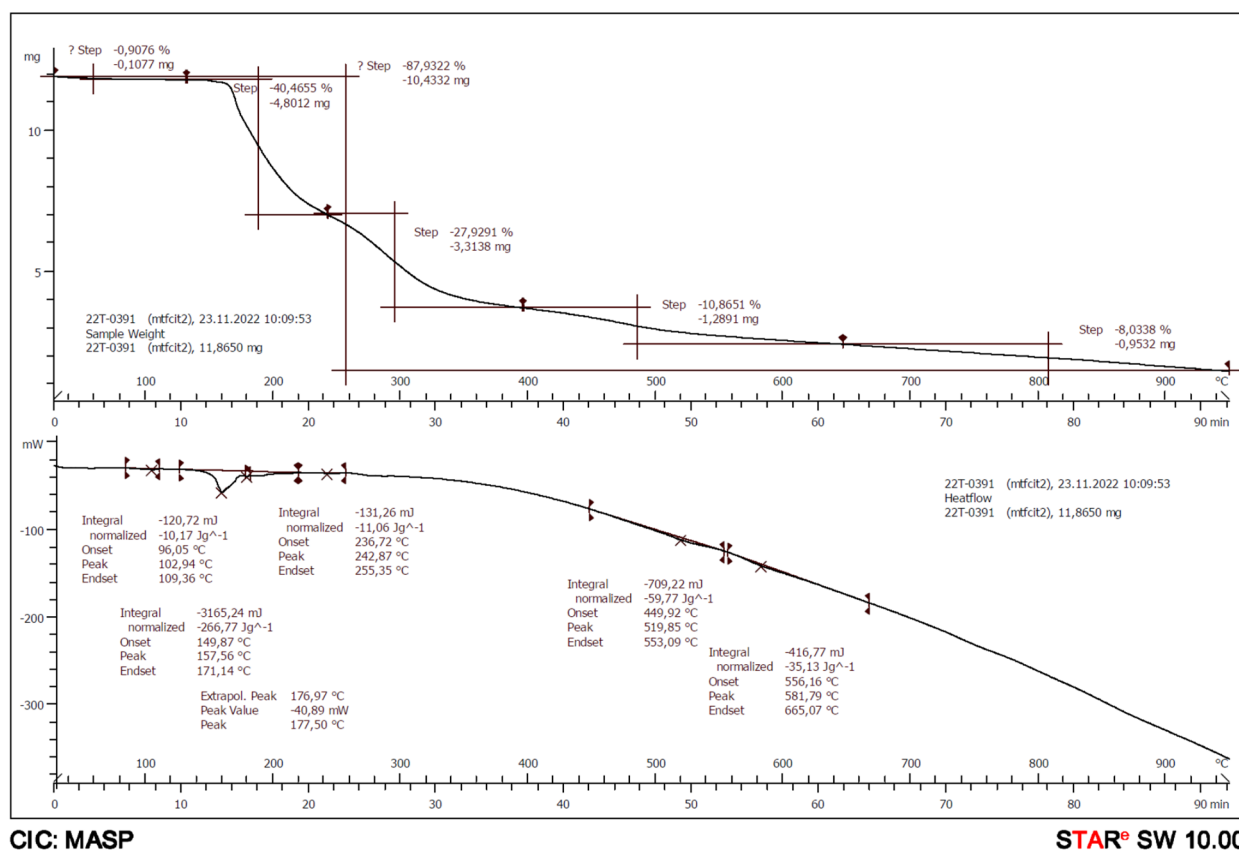

**Figure S3.** Complete DSC/TGA of MTF-CIT salt from 25 to 900 °C.
